# Supplementary material for: Scalable Extraction of Airway Mucins from Porcine Trachea
Source: PubMed Central journal article supplement — bioRxiv. 2024 Oct 8:2024.10.08.617223. Preprint. [Version 1] doi: 10.1101/2024.10.08.617223 (PMC11482867; doi:10.1101/2024.10.08.617223), 2024-10-08

## Scalable Extraction of Airway Mucins from Porcine Trachea

Sydney Yang<sup>1‡</sup>, Elizabeth M. Engle<sup>1,2‡</sup>, Allison Boboltz<sup>1</sup>, Sahana Kumar<sup>1,2</sup>, Alexa Stern<sup>1</sup>, Gregg A. Duncan<sup>1,2</sup>

<sup>1</sup>Fischell Department of Bioengineering, <sup>2</sup>Molecular and Cellular Biology Program, University of Maryland, College Park, Maryland, United States of America, 20742

\*Correspondences to: Gregg Duncan; email: gaduncan@umd.edu

‡These authors contributed equally to this work.

### SUPPLEMENTAL INFORMATION

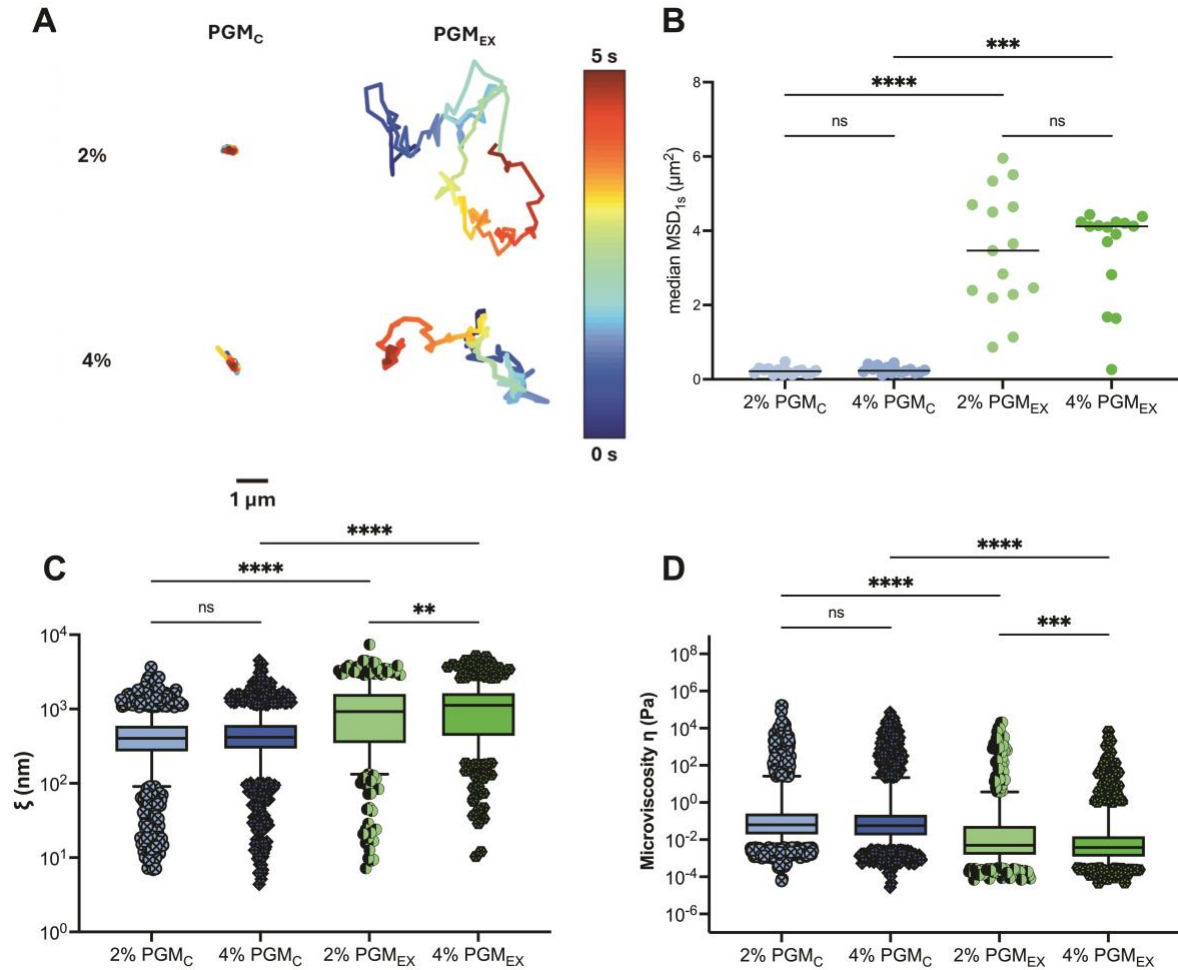

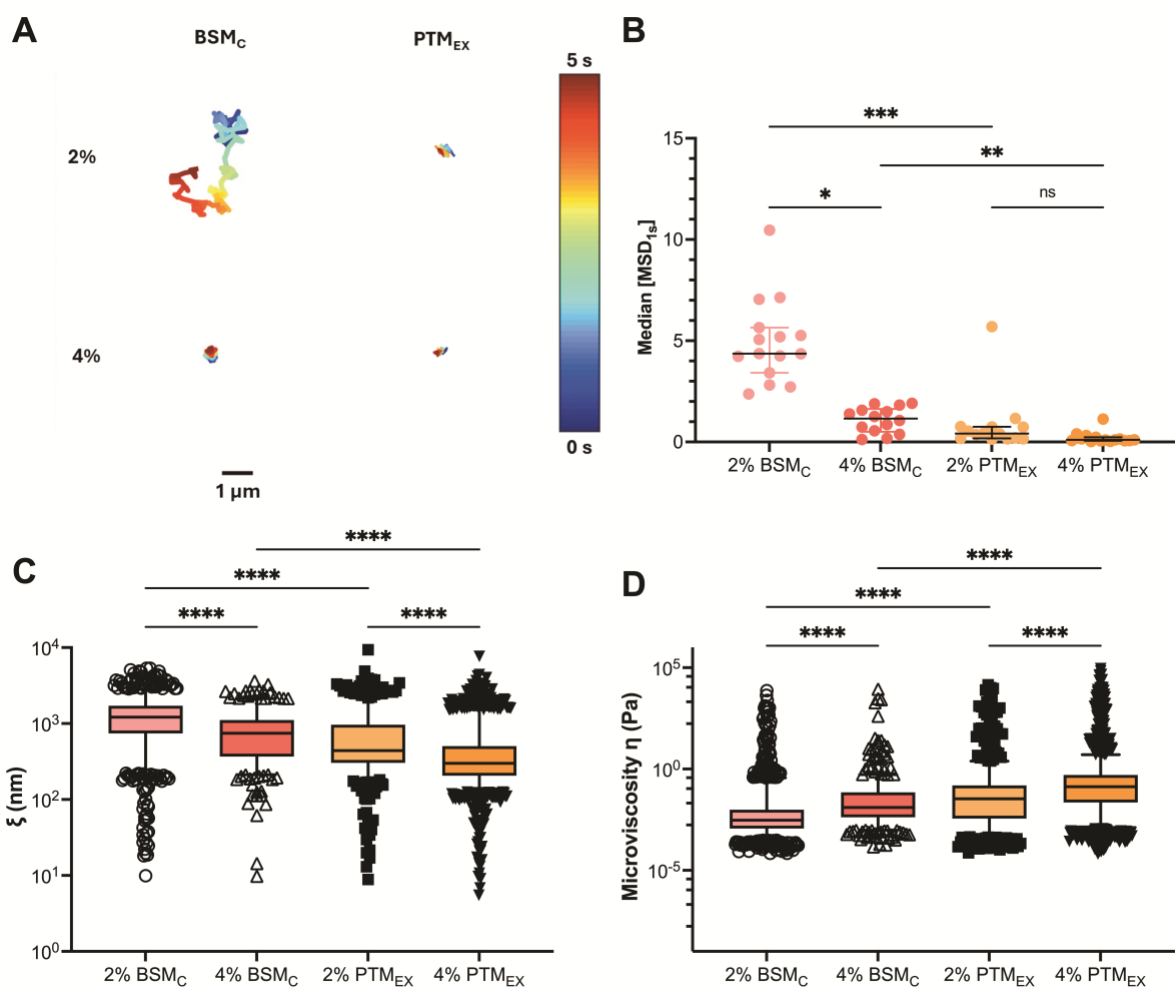

Supplement: media-1.pdf [file media-1.pdf]
